# Supplementary material for: Type-I-IFN-Stimulated Gene TRIM5γ Inhibits HBV Replication by Promoting HBx Degradation
Source: PubMed Central journal article supplement — Cell Rep. Author manuscript; Available in PMC 2020 Dec 10. (PMC6996557; doi:10.1016/j.celrep.2019.11.041), 2019-12-10
Supplement: NIHMS1068736-supplement-Supp1.pdf [file NIHMS1068736-supplement-Supp1.pdf]

Cell Reports, Volume 29

## Supplemental Information

**Type-I-IFN-Stimulated Gene TRIM5 $\gamma$**

**Inhibits HBV Replication**

**by Promoting HBx Degradation**

**Guangyun Tan, Zhaohong Yi, Hongxiao Song, Fengchao Xu, Feng Li, Roghiyh Aliyari, Hong Zhang, Peishuang Du, Yanhua Ding, Junqi Niu, Xiaosong Wang, Lishan Su, F. Xiao-Feng Qin, and Genhong Cheng**

## Supplementary figures and figure legends

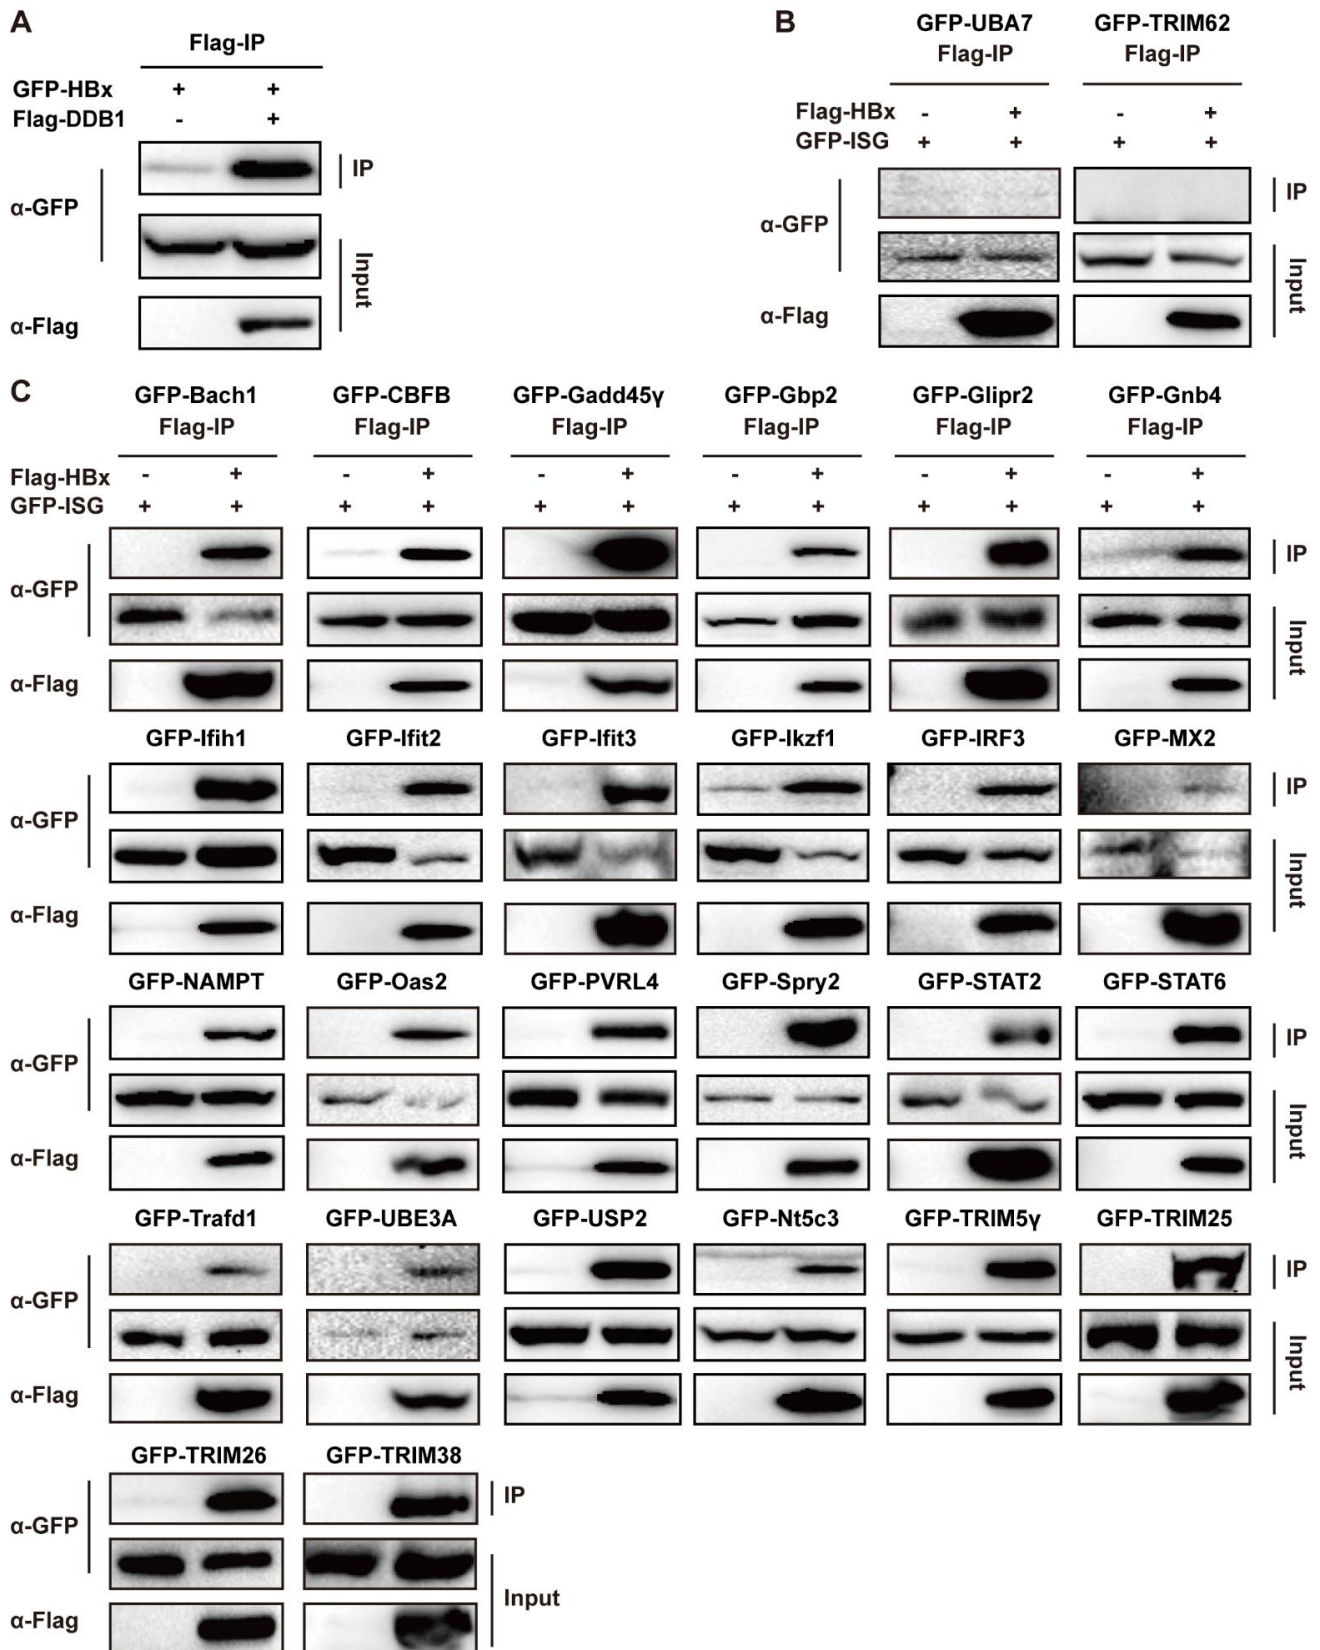

**Figure S1. Confirming the ISGs-HBx interaction by Co-immunoprecipitation assay in 293T cells, Related to Figure 1.**

**(A)** The GFP-HBx expression plasmid was co-transfected with Flag-DDB1 or an empty Flag reporter plasmid (Flag-EV) into 293T cells as indicated; 28 h later, cells were harvested and lysed. 1/20 of the whole cell lysates were used as input, and the rest were incubated overnight with Flag-tagged beads. After washing, the beads were boiled with SDS loading buffer and subjected to immunoblotting using anti-GFP or anti-Flag antibodies. **(B)** Plasmids expressing two ISGs (UBA7 or TRIM62) negative for HBx interaction in the BIFC assay were co-transfected with Flag-HBx or Flag-EV plasmids into 293T cells as indicated, and analyzed as in **A**. **(C)** Plasmids expressing ISGs positive for HBx interaction by BIFC assay were co-transfected with Flag-HBx or Flag-EV plasmids into 293T cells as indicated, and analyzed as in **A**.

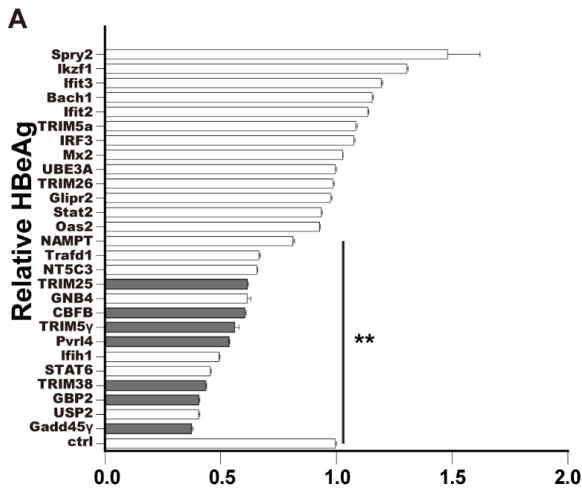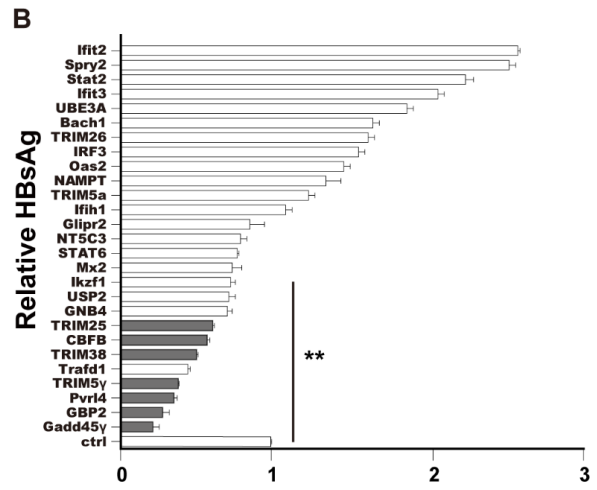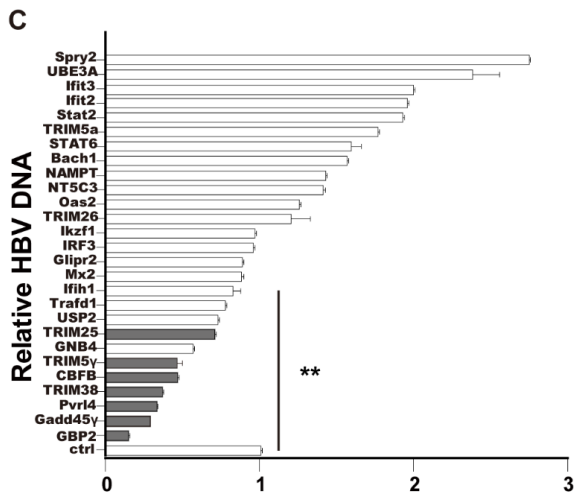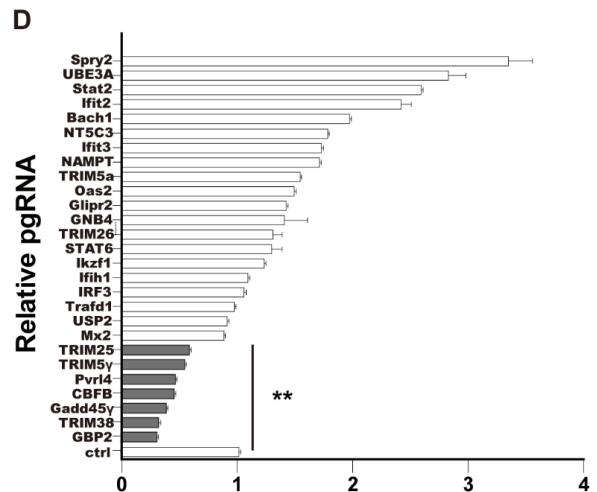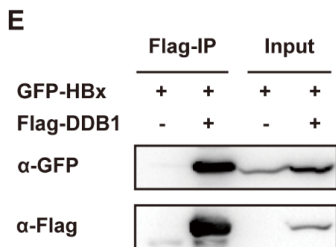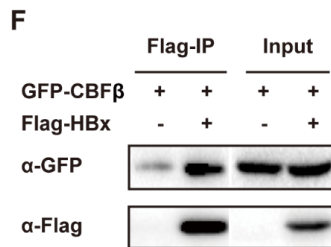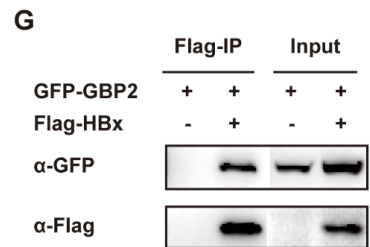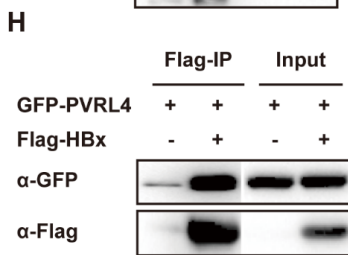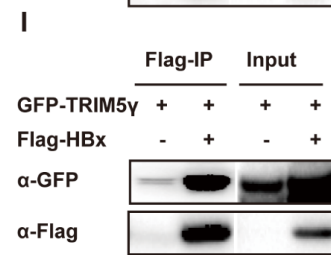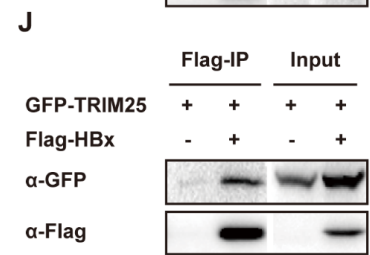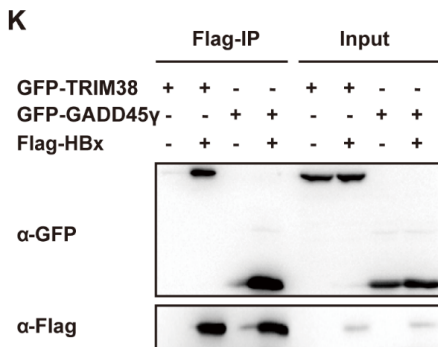

**Figure S2. Evaluation of anti-HBV replication and HBx interaction activity of 7 ISG products in HepG2 cells, Related to Figure 1.**

(A,B) pHBV1.3 plasmid DNA was co-transfected into HepG2 cells with either an empty GFP reporter plasmid (GFP-EV) or GFP reporter plasmids encoding ISG products positive for interaction with HBx by both BiFC and Co-IP assays. After 72 hours, culture media was collected and screened for HBeAg, HBsAg expression by ELISA. (C,D) The supernatant and cell lysates were subjected to HBV DNA and RNA isolation; HBV DNA and pgRNA were analyzed by Q-PCR. Mean ( $\pm$ SD) values from three independent experiments are shown.  $**p < 0.01$ . (E) The GFP-HBx expression plasmid was co-transfected with Flag-DDB1 or an empty Flag reporter plasmid (Flag-EV) plasmids into HepG2 cells as indicated; 24 hours later, cells were harvested and lysed. 1/20 of the whole cell lysates were used as input, and the rest were incubated overnight with Flag-tagged beads. After washing, the beads were boiled with SDS loading buffer and subjected to immunoblotting using anti-GFP or -Flag antibodies. (F-K) 7 GFP-tagged ISGs expression plasmids were co-transfected with Flag-HBx or an Flag-EV plasmids as indicated, and cells were collected after 24 hours and analyzed as in E.

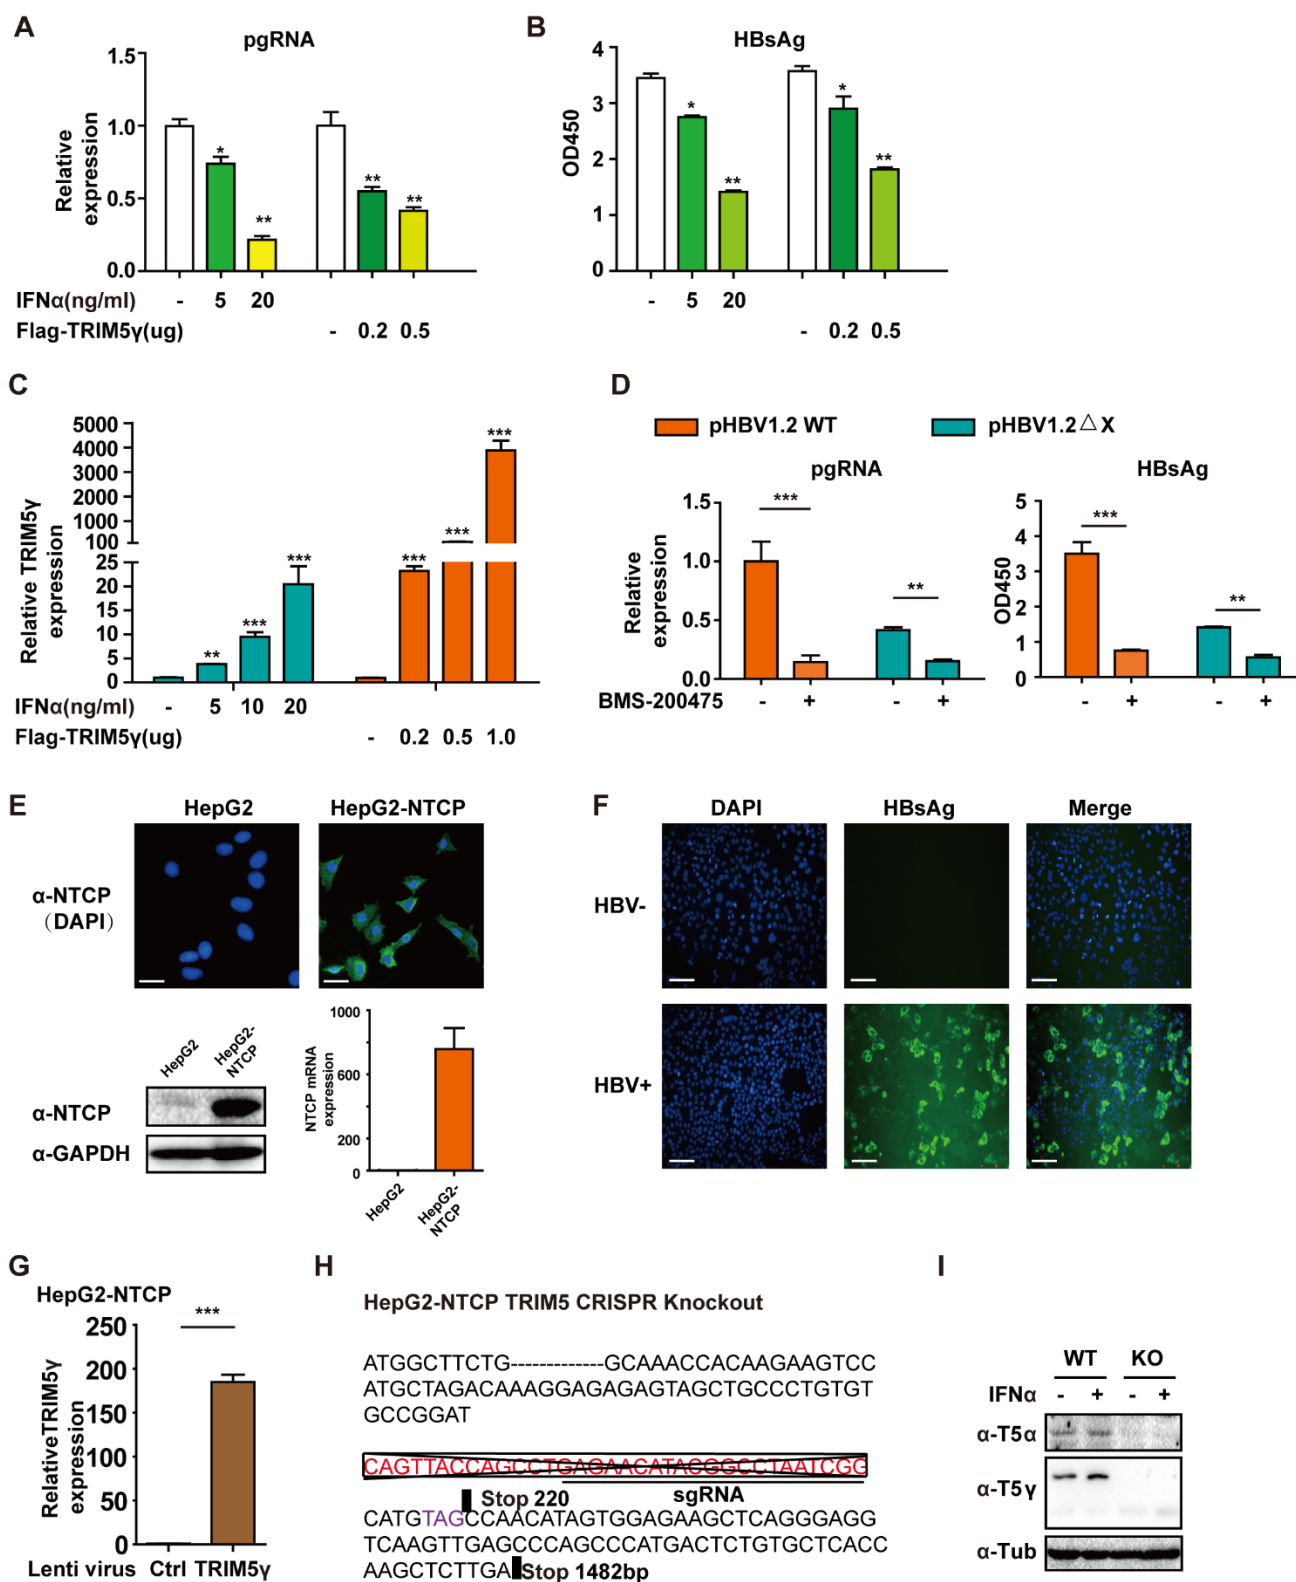

**Figure S3. Related to Figure 3.** (A, B) pHBV1.3 plasmid DNA was transfected into HepG2 cells alone or co-transfected with constructs expressing TRIM5 $\gamma$  proteins. 24 h later, cells transfected with pHBV1.3 plasmid alone were treated with IFN- $\alpha$  as indicated, after 48 h, cells and supernatant were harvested and subjected to Q-PCR or ELISA. (C) HepG2 cell were transfected and treated as in A, and subjected to Q-PCR to analyze TRIM5 $\gamma$  mRNA expression. (D) HepG2 cells were transfected

with constructs expressing pHBV1.2 WT or  $\Delta$ X as indicated. 24 h later, cells were treated with BMS-200475 (1  $\mu$ M) for 24 h or left untreated, cells and supernatant were harvested and subjected to Q-PCR or ELISA. **(E)** Expression of NTCP in HepG2 or HepG2-NTCP cells were analyzed by Immunofluorescence, Western Blot or Q-PCR. Scale bar represents 20  $\mu$ m. Mean ( $\pm$ SD) values from three independent experiments are shown. \* $p$ <0.05, \*\* $p$ <0.01, \*\*\* $p$ <0.001. **(F)** HBsAg expression in HepG2-NTCP cells with or without HBV infection were analyzed by Immunofluorescence. Scale bar represents 100  $\mu$ m. **(G)** Samples from Figure 3C were subjected to Q-PCR to analyse the expression of TRIM5 $\gamma$  mRNA. Mean ( $\pm$ SD) values from three independent experiments are shown. \*\*\* $p$ <0.001. **(H)** Diagram of HepG2-NTCP cells TRIM5 $\alpha/\gamma$  KO results, bases from 180 to 213 were cut off in the coding region of TRIM5 and make a shorter transcript stopped at 220 bp. **(I)** Samples from Figure 3D were analyzed by immunoblotting using antibodies as indicated.

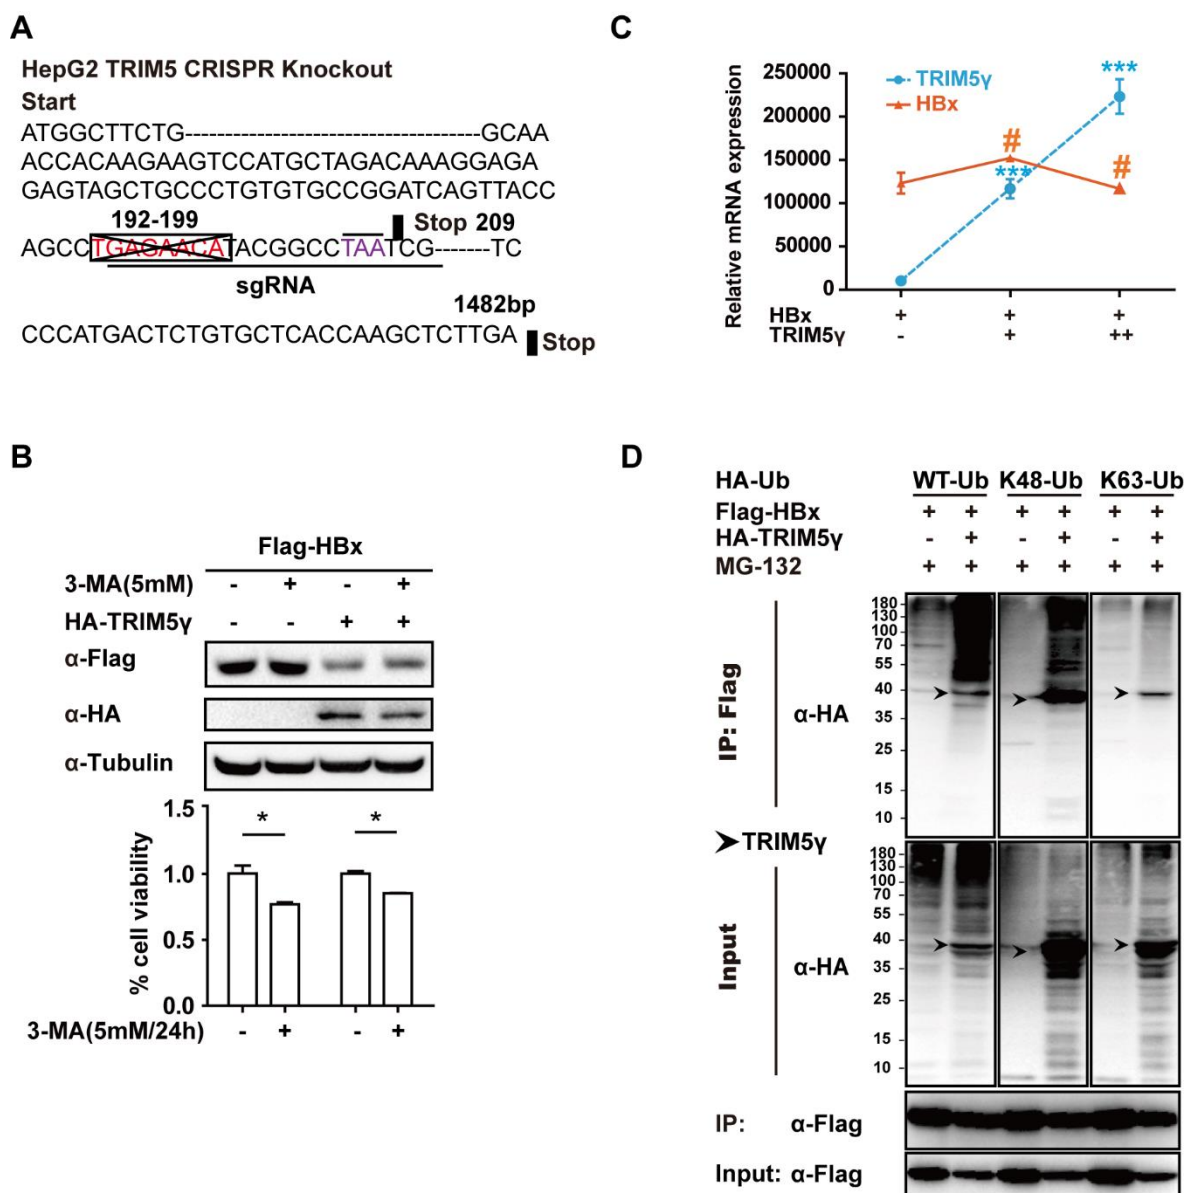

**Figure S4. Related to Figure 4.** (A) Diagram of HepG2 cells TRIM5 $\alpha/\gamma$  KO results; bases from 192 to 199 were cut off in the coding region of TRIM5 and make a shorter transcript stopped at 209bp. (B) HepG2 cells were co-transfected with HA-TRIM5 $\gamma$  and Flag-HBx as indicated; 24 h later, cells were treated with 3-MA (5mM, autophagy inhibitor) for another 24 h or left untreated, cell viability was measured by a CCK8 kit, and whole cell lysates were subjected to immunoblotting analysis using the indicated antibodies. (C) 293T cells were co-transfected with HA-TRIM5 $\gamma$  and Flag-HBx as indicated; 36 h later, cells were subjected to RNA extraction and Q-PCR was performed to evaluate the expression levels of TRIM5 $\gamma$  and HBx transcripts. Mean ( $\pm$ SD) values from three independent experiments are shown. \* $p$ <0.05, \*\* $p$ <0.01, # $p$ >0.05. (D) HepG2 cells were co-transfected with HA-Ub and Flag-HBx, with or without HA-TRIM5 $\gamma$  expression plasmids; 24 h later, cells were treated with MG-132 as indicated for 6 h, and subjected to Co-IP analysis. Cell lysates and co-IP samples were subjected to immunoblotting analysis using the indicated antibodies.





**Supplementary Table 1. HBV infected patients with IFN treatment, Related to Figure 2.**

| NO | Sex | Age | before treatment |          |            |              | 17 weeks after treatment |           |             |               | Gene induction         |                |
|----|-----|-----|------------------|----------|------------|--------------|--------------------------|-----------|-------------|---------------|------------------------|----------------|
|    |     |     | AST<br>0         | ALT<br>0 | HBeAG<br>0 | HBV DNA<br>0 | AST<br>17                | ALT<br>17 | HBeAG<br>17 | HBV DNA<br>17 | TRIM5 $\gamma$<br>fold | TRIM22<br>fold |
| 1  | M   | 28  | 188              | 280      | 963.762    | 170000000    | 63                       | 64        | 13.754      | 119000        | 10.29                  | 5.86           |
| 2  | F   | 22  | 60               | 106      | 861.489    | 170000000    | 59                       | 96        | 782.74      | 170000000     | 1.82                   | 1.23           |
| 3  | F   | 22  | 130              | 162      | 903.773    | 124000000    | 104                      | 141       | 657.992     | 14500000      | 0.91                   | 2.54           |
| 5  | F   | 36  | 78               | 152      | 1368.318   | 170000000    | 21                       | 17        | 35.267      | 165000        | 6.63                   | 0.71           |
| 6  | M   | 55  | 111              | 293      | 1240       | 170000000    | 55                       | 117       | 667.605     | 170000000     | 0.47                   | 1.4            |
| 7  | M   | 43  | 95               | 219      | 675.52     | 170000000    | 73                       | 135       | 434.09      | 170000000     | 1.11                   | 10.56          |
| 8  | F   | 24  | 54               | 108      | 0.455      | 2560000      | 44                       | 65        | 0.349       | 296           | 10.18                  | 17.1           |
| 9  | M   | 38  | 89               | 145      | 1028.726   | 170000000    | 80                       | 82        | 20.289      | 1310000       | 0.78                   | 0.99           |
| 10 | M   | 39  | 89               | 91       | 0.433      | 25400000     | 193                      | 273       | 0.415       | 224           | 1.67                   | 1.35           |
| 11 | M   | 24  | 86               | 227      | 12.351     | 498000       | 39                       | 68        | 4.455       | 1120          | 2.4                    | 20.13          |
| 12 | M   | 26  | 64               | 188      | 1134.673   | 255000000    | 42                       | 73        | 1071.894    | 142000000     | 2.03                   | 15.03          |
| 13 | M   | 31  | 52               | 89       | 1293.93    | 165000000    | 45                       | 54        | 803.594     | 5120000       | 2.73                   | 2.33           |
| 14 | M   | 49  | 88               | 206      | 1045.839   | 170000000    | 83                       | 154       | 686.078     | 56200000      | 0.96                   | 1.95           |
| 15 | F   | 31  | 62               | 172      | 840.371    | 170000000    | 30                       | 36        | 2.837       | 1390          | 12.71                  | 2.1            |
| 16 | M   | 23  | 52               | 89       | 9.171      | 2080000      | 40                       | 51        | 2.771       | 3170          | 3.36                   | 1.71           |
| 17 | M   | 42  | 62               | 128      | 1256.277   | 38000000     | 29                       | 36        | 1.202       | 1130          | 10.34                  | 7.37           |
| 18 | M   | 22  | 101              | 360      | 117.151    | 1440000      | 18                       | 15        | 81.417      | 196000        | 3.21                   | 3.11           |
| 19 | F   | 34  | 144              | 337      | 202.293    | 31300000     | 49                       | 54        | 23.13       | 42800000      | 6.52                   | 3.48           |
| 20 | M   | 32  | 255              | 247      | 684.086    | 9570000      | 74                       | 69        | 15.661      | 2720          | 10.18                  | 1.16           |
| 21 | M   | 22  | 92               | 108      | 1011.575   | 84600000     | 52                       | 45        | 559.859     | 2330000       | 3.74                   | 1.86           |
| 22 | M   | 31  | 58               | 125      | 5.325      | 9950000      | 29                       | 36        | 0.469       | 306           | 44.28                  | 15.26          |
| 23 | M   | 25  | 54               | 84       | 1145.428   | 45000000     | 38                       | 31        | 582.172     | 3120000       | 5.89                   | 1.23           |
| 24 | M   | 35  | 79               | 117      | 732.383    | 170000000    | 24                       | 18        | 742.352     | 20600000      | 7.64                   | 3.01           |
| 25 | F   | 33  | 81               | 164      | 776.892    | 170000000    | 29                       | 43        | 318.496     | 31800000      | 4.78                   | 0.23           |
| 26 | M   | 41  | 73               | 206      | 824.12     | 35100000     | 49                       | 87        | 12.839      | 45600         | 31.03                  | 3.88           |
| 27 | F   | 31  | 64               | 101      | 0.345      | 65900000     | 41                       | 44        | 0.41        | 6690000       | 3.96                   | 5.86           |
| 28 | M   | 56  | 72               | 177      | 0.399      | 198000       | 129                      | 194       | 0.408       | 23.1          | 2.78                   | 44.23          |
| 29 | F   | 26  | 52               | 93       | 20.685     | 170000000    | 39                       | 52        | 14.56       | 102000000     | 1.79                   | 60.15          |
| 30 | M   | 20  | 60               | 86       | 344.962    | 10100000     | 52                       | 72        | 69.589      | 1740000       | 4.88                   | 0.26           |
| 31 | F   | 33  | 94               | 205      | 1589.529   | 170000000    | 88                       | 171       | 1639.966    | 170000000     | 4.40                   | 1.98           |
| 32 | F   | 33  | 41               | 101      | 158.344    | 767000       | 33                       | 36        | 713.4       | 4040000       | 1                      | 3.12           |

**Supplementary Table 2. SgRNAs and Primers for infusion cloning, Related to STAR Methods**

**TRIM5 primers**

| GENE          | PRIMER                                                               |
|---------------|----------------------------------------------------------------------|
| T5a cloning F | GAAGAATTCATGGGTTACCCTTATGATGTGCCAGATTATGCCATG<br>GCTTCTGGAATC        |
| T5a cloning R | GAACTCGAGTCA AGA GCTTGGTGAG                                          |
| T5γ cloning F | GAAGAATTCATGGGTTACCCTTATGATGTGCCAGATTATGCCATGGCTTCTGGA<br>ATC        |
| T5γ cloning R | GAACTCGAGTTATAAGGAGGGGTAAG                                           |
| ΔRB F         | GAATCTAGAATGGGTTACCCTTATGATGTGCCAGATT<br>ATGCCATGACAGAGGAGGTTGCC     |
| ΔR F          | GAA TCTAGA ATGGGTTACCCTTATGATGTGCCAGATTATGCC<br>ATGATCAGTTACCAGCCT G |
| RB R          | GAA GGATCC TTA GAG GAA CGT GTG GTG                                   |
| BB F          | GAA GAATTC ATG CAT TGT GCA CGC CAT G                                 |
| BB R          | GAA GTCGAC TTA GAG GAA CGT GTG GTG                                   |

**HBx primers**

| GENE        | PRIMER                                 |
|-------------|----------------------------------------|
| HBx FORWARD | TCGCGGCCGCTCTAGA ATGGCTGCTCGGGTGTGCTGC |
| HBx REVERSE | AGGCGCCTGGTCTAGA TTAGGCAGAGGTGAAAAAG   |

**TRIM31 primers**

| GENE            | PRIMER                                 |
|-----------------|----------------------------------------|
| TRIM31C31H33A F | GTCACCATCGACGCTGGGGCCAATTTCTGCCTC      |
| TRIM31C31H33A R | GAGGCAGAAATTGGCCCCAGCGTCGATGGTGAC      |
| TRIM31cloning F | TCGCGGCCGCTCTAGAATGGCCAGTGGGCAGTTT     |
| TRIM31cloning R | AGGCGCCTGGTCTAGATTAGCTTGAAGGAACCTCACAA |

**sgRNAs**

| GENE           | PRIMER                          |
|----------------|---------------------------------|
| TRIM5α sgRNA1F | CACCgTGGTAACTGATCCGGCACAC       |
| TRIM5α sgRNA1R | AAACGTGTGCCGGATCAGTTACCAc       |
| TRIM5α sgRNA2F | CACCgCGATTAGGCCGTATGTTCTC       |
| TRIM5α sgRNA2R | AAACGAGAACATACGGCCTAATCGc       |
| TRIM31 sgRNAF  | CACC CAA CTC GCT GTT GCG GAA TC |
| TRIM31 sgRNAR  | AAAC GA TTC CGC AAC AGC GAG TTG |

**Supplementary Table 3. Q-PCR primers, Related to STAR Methods**

| <b>Gene</b>    | <b>Forward</b>          | <b>Reverse</b>           |
|----------------|-------------------------|--------------------------|
| GAPDH          | CGGATTTGGTCGTATTGGG     | TCTCGCTCCTGGAAGATGG      |
| HBVDNA         | GAGTGTGGATTTCGCACTCC    | GAGGCGAGGGAGTTCTTCT      |
| pgRNA          | TCTTGCCTTACTTTTGGAAG    | AGTTCTTCTTCTAGGGGACC     |
| HBx            | ACGTCCTTTGTTTACGTCCCGT  | CCCAACTCCTCCCAGTCCTTAA   |
| TRIM5 $\gamma$ | TATCATAAGCCACCCTGCGG    | TGTGTGTCCTTGGAAGGAGAATCA |
| CBFB           | AGTTTGATGAGGAGCGAGCC    | TCTTCTTGCCTCCATTCCTCC    |
| GBP2           | CATCCGAAAGTTCTTCCCAA    | CTCTAGGTGAGCAAGGTACTTCT  |
| GADD45G        | CAGATCCATTTTACGCTGATCCA | TCCTCGCAAACAGGCTGAG      |
| PVRL4          | AGGACGCAAAACTGCCCTG     | TGAAGCCCGTATTTGGAGTGC    |
| TRIM25         | AGGGATGAGTTCGAGTTTCTGG  | GTTTTTGAGGTCTATGGTGCTCT  |
| TRIM38         | ACACGGAGAGCAGTTCCAC     | GGCATACTCTTCAACAAGAGC    |
